# Supplementary material
Source: Royal Society of Chemistry journal article supplement (doi:10.1039/d6py00167j)
Supplement: d6py00167j1.pdf [file d6py00167j1.pdf]

# Supplementary Information

## Nanomicellization characteristics of amphiphilic block copolymer tricycles in various topologies

Brian J. Ree

*Functional and Structural Polymers Laboratory, Department of Chemistry and Physics, The Dorothy and George Hennings College of Science, Mathematics and Technology, Kean University, 1000 Morris Ave, Union, NJ 07083, USA*

### Scattering data analysis

**Invariant  $Q$ .** From the obtained 1D scattering intensity profile, the invariant  $Q$  could be determined by using the following relation:<sup>S1,S2</sup>

$$Q = \frac{1}{2\pi^2} \int_0^\infty q^2 I(q) dq. \quad (\text{S1})$$

where  $I(q)$  is the measured scattering intensity and  $q$  is the magnitude of the scattering vector defined as  $q = (4\pi/\lambda)\sin\theta$  in which  $2\theta$  is the scattering angle and  $\lambda$  is the wavelength of the X-ray beam used.

**Guinier analysis.** The scattering data could be analyzed first in a qualitative manner by using the Guinier scheme,<sup>S1-S7</sup> which is a model independent method but assuming that particles in solution are spherical and possess a uniform density:

$$\ln I(q) = \ln I_o(q) - \frac{q^2 R_{g,G}^2}{3} \quad (S2)$$

where  $I_o(q)$  is the incident beam intensity and  $R_{g,G}$  is the radius of gyration of micelles or aggregates in solution;  $R_{g,G}$  can be determined from the low  $q$  region ( $qR_{g,G} < 1.33$ ) of the scattering data.

**Three phase ellipsoid (3PEL) model.** The 3PEL model consists of three phases: a dense core, a dense corona, and a solvated corona.<sup>S3</sup> For this model structure, the scattering intensity can be expressed by the sum of two terms under assumption that the contribution of their cross term is very small or negligible:

$$I(q) = P_{3PEL}(q) + P_{blob}(q) \quad (S3)$$

where  $P_{3PEL}(q)$  is the form factor that describes an ellipsoidal particle consisting of three layer phases and  $P_{blob}(q)$  is the scattering contribution from the density fluctuations smaller than the blob radius within the corona regions.  $P_{3PEL}(q)$  can be given by the following:

$$P_{3PEL}(q) = \int_0^{\frac{\pi}{2}} \left\{ \begin{array}{l} [(\rho_{\text{matrix}} - \rho_{\text{s.corona}})V_{\text{s.corona}}F_{\text{s.corona}}^2] + \\ [(\rho_{\text{s.corona}} - \rho_{\text{d.corona}})V_{\text{d.corona}}F_{\text{d.corona}}^2] + \\ [(\rho_{\text{d.corona}} - \rho_{\text{core}})V_{\text{core}}F_{\text{core}}^2] \end{array} \right\} \sin \varphi d\varphi \quad (S4)$$

where  $\rho_i$ ,  $V_i$ , and  $F_i$  are the density, volume, and form factors of phase  $i$ , respectively, and  $\rho_{\text{matrix}}$  is assumed to be 0 due to background subtraction.

Form factor for each phase can be expressed as the following generalized form  $F_i$  based on three components,  $F[q,r(R_{e,i},\varepsilon,\varphi)]$ ,  $n(A)$ , and  $n(t_f)$ :

$$F_i = F [q,r(R_{e,i},\varepsilon,\varphi)] \cdot n(A) \cdot n(t_f) \quad (S5)$$

with  $F[q,r(R_{e,i},\varepsilon,\varphi)]$  as the scattering amplitude defining the size and shape,  $n(A)$  defining the degree of size distribution following Gaussian distribution, and  $n(t_f)$  defining the degree of fuzziness for each phase.

Scattering amplitudes of the core, dense corona, and solvated corona, take a spheroid shape with a pair of equal semi-axes ( $R$ ,  $R$ ) and a distinct third semi-axis ( $\varepsilon R$ ) (*i.e.*, an ellipsoid of

gyration). The ellipsoidicity ratio  $\varepsilon$  is defined as  $\varepsilon = R_p/R_e$  and therefore the complete scattering amplitude can be defined as:

$$F[q, r(R_{e,i}, \varepsilon, \varphi)] = \frac{3 \{ \sin[qr(R_{e,i}, \varepsilon, \varphi)] - qr(R_{e,i}, \varepsilon, \varphi) \cos[qr(R_{e,i}, \varepsilon, \varphi)] \}}{[qr(R_{e,i}, \varepsilon, \varphi)]^3} \quad (S6)$$

with

$$r(R_{e,i}, \varepsilon, \varphi) = R_{e,i} (\sin^2 \varphi + \varepsilon^2 \cos^2 \varphi)^{\frac{1}{2}} \quad (S7)$$

where  $\varphi$  is the modular angle of ellipsoid.  $R_{e,i}$  corresponds to: the core radius  $r_{e,core}$ , the sum of core radius  $r_{e,core}$  and dense corona thickness  $t_{d,corona}$ , and the sum of core radius  $r_{e,core}$ , dense corona thickness  $t_{d,corona}$  and solvated corona thickness  $t_{s,corona}$ , for the three phases respectively:

$$R_{e,core} = r_{e,core} \quad (S8)$$

$$R_{e,d,corona} = r_{e,core} + t_{d,corona} \quad (S9)$$

$$R_{e,d,corona} = r_{e,core} + t_{d,corona} + t_{s,corona} \quad (S10)$$

Size distribution for core radius, dense corona thickness, and solvated corona thickness is expressed in the following form:

$$n(A) = \frac{1}{\sqrt{2\pi}\sigma_A} \cdot e^{-\frac{(A-\bar{A})^2}{2\sigma_A^2}} \quad (S11)$$

where  $A$  corresponds to the magnitude of core radius or the dense corona thickness or the solvated corona thickness,  $\bar{A}$  is the mean value of  $A$ , and  $\sigma_A$  is the standard deviation of  $A$  from  $\bar{A}$ .

The degrees of fuzziness of the core, dense corona, and solvated corona, which describe the gradual change in density amongst the three phases, are defined as:

$$n(t_f) = e^{-\frac{q^2 t_f^2}{4}} \quad (S12)$$

where  $2t_f$  is the width (*i.e.*, thickness) of the fuzzy interface at the surface of each phase (core, dense corona, and solvated corona).

On the other hand,  $P_{blob}(q)$  can be expressed by the following relation:<sup>S3,S8</sup>

$$P_{\text{blob}}(q) = \frac{\alpha'}{\mu q_{\text{blob}}^*} \frac{\sin[\mu \tan^{-1}(q_{\text{blob}}^*)]}{[1+(q_{\text{blob}}^*)^2]^{\mu/2}} \quad (\text{S13})$$

where  $q_{\text{blob}}^* = q^* \xi$ ,  $\mu = \chi^{-1} - 1$ , and  $\alpha' = \alpha 4\pi\mu\xi^{\mu+1}\Gamma(\mu)$ ; here,  $q^* = q/[\text{erf}(qR_{\text{g},3\text{PEL}}/\sqrt{6})]^3$  where  $\text{erf}$  indicates the error function,  $\xi$  is the average correlation length (i.e., mean blob size),  $\chi$  is the Flory-Huggins parameter ( $\chi = 3/5$  for the good solvent condition and  $1/2$  for the  $\Theta$  solvent condition),  $\alpha$  is the amplitude of the blob scattering relative to the shape contribution, and  $\Gamma(\mu)$  indicates the gamma function.

**Pair distribution function.** The pair distance distribution function  $p(r)$  can provide information on the probability of finding two scatterers separated by a distance  $r$  inside a micelle. The  $p(r)$  profile could be obtained from the results of the scattering data fits with the 3PEL models by Fourier transformation using the following relation:<sup>S3-S5,S9,S10</sup>

$$p(r) = \frac{1}{2\pi} \int_0^\infty I(q)qr \sin(qr) dq. \quad (\text{S14})$$

From the  $p(r)$  profiles, the radii of gyration  $R_{\text{g,IFT}}$  of the micelles could be further estimated by using the following equation:

$$R_{\text{g},p(r)} = \frac{\int_0^\infty p(r)r^2 dr}{2 \int_0^\infty p(r) dr}. \quad (\text{S15})$$

**Radial density profile.** Furthermore, a radial scattering length density profile  $\Delta\rho(r)$  (i.e., radial density profile) of micelle could be estimated from the scattering amplitude determined by the 3PEL model analysis. The  $\Delta\rho(r)$  can be obtained from  $F_i$  in equation S5 through the following numerical Fourier transformation:<sup>S4,S11</sup>

$$\Delta\rho(r) = \frac{1}{2\pi^2} \int F_i \frac{\sin(qr)}{qr} dq. \quad (\text{S16})$$

## References

- S1 A. Guinier, Fournet, G. Small Angle Scattering X-Ray, Wiley, New York, 1955
- S2 B. Lee, T. J. Shin, S. W. Lee, J. Yoon, J. Kim and M. Ree, *Macromolecules*, 2004, **37**, 4174–4184.
- S3 B. J. Ree, Y. Satoh, K. S. Jin, T. Isono, W. J. Kim, T. Kakuchi, T. Satoh and M. Ree, *NPG Asia Mater.*, 2017, **9**, e453.
- S4 K. H. Ngoi, J. C. Wong, W. S. Chiu, C. H. Chia, K. S. Jin, H.-J. Kim, H.-C. Kim and M. Ree, *J. Ind. Eng. Chem.*, 2021, **95**, 37–50.
- S5 J. C. Wong, L. Xiang, K. H. Ngoi, C. H. Chia, K. S. Jin, H.-C. Kim, H.-J. Kim, A. Hirao and M. Ree, *Polymer*, 2021, **212**, 123304.
- S6 B. J. Ree, T. Satoh and T. Yamamoto, *Polymers*, 2019, **11**, 163.
- S7 S. R. Shin, K. S. Jin, C. K. Lee, S. I. Kim, G. M. Spinks, I. So, J.-H. Jeon, T. M. Kang, J. Y. Mun, S.-S. Han, M. Ree and S. J. Kim, *Adv. Mater.*, 2009, **21**, 1907–1910.
- S8 S. Rathgeber, M. Monkenbusch, M. Kreitschmann, V. Urban and A. Brulet, *J. Chem. Phys.*, 2002, **117**, 4047.
- S9 O. Glatter, *J. Appl. Crystallogr.*, 1977, **10**, 415–421.
- S10 R.-J. Roe, *Methods of X-Ray and Neutron Scattering in Polymer Science*, Oxford University Press, New York, 2000.
- S11 M. Stieger, W. Richtering, J.S. Pedersen and P. Lindner, *J. Chem. Phys.*, 2004, **120**, 6197.
